# Supplementary material
Source: PubMed Central journal article supplement (PMC3166706)
Supplement: supp_kwr130_kwr130_Web_Appendix.pdf [file supp_kwr130_kwr130_Web_Appendix.pdf]

## Web Appendix KWR130

### PROC MI code:

```
PROC MI data=gravide_nt seed=17655417 nimpute=5 out=imputed;
em maxiter=400 converge=0.01;
mcmc impute=full initial=em(maxiter=400 converge=0.01);
transform log(partnerage parity gravidity PhysicalActivityModerate PhysicalActivityHard
packyears packyears_partner coffeenumbe r cokelightnumber redwinenumber beernumber
herbalteanumber otherteanumber cokenumbe r otherfizzysftdrinksnumber steady_yrs
otherfizzysftdrinksnumber VocationalTraining decafcoffeenumber spiritsnumber
whitewinenumber DessertWineNumber AgeRegularPeriod monthswait agefirstoc durationoc
contrpillsbrands/c=1);
var age menstruationcyclus ttp_entry ttp_exit pregnant pregnant_viable partnerage parity
agefirstperiod hight weight regularcycles IntercourseFrequency PhysicalActivityModerate
PhysicalActivityHard smoking_group packyears packyears_partner
inttimedich ocpills otherhormonalbc barriermethods withdrawalrhythm weightpartner hightpartner
coffeenumber cokelightnumber redwinenumber beernumber herbalteanumber otherteanumber
cokenumbe r otherfizzysftdrinksnumber steady_yrs otherfizzysftdrinksnumber
VocationalTraining decafcoffeenumber spiritsnumber whitewinenumber DessertWineNumber
birthweight mothersmkgpregyes term notterm1t38wks nottermgt42wks hbp thyroid pid diab endometr
fibroids ovcyst PeriodNextTime AgeRegularPeriod IrregPeriod MenstruationDuration
MenstruationHeavy monthswait agefirstoc durationoc timesincelastoc caesarean gravidity
contrpillsbrands SmearTestNeckUterus weightl17yrold hips waist;
run;
```

### Explanation of variables:

Age - Age of female participant (years)  
Menstruationcyclus - menstrual cycle length (days)  
ttp\_entry - number of attempted cycles at study entry (cycles)  
ttp\_exit - number of attempted cycles at study exit (cycles)  
pregnant - had pregnancy over follow-up, including pregnancy losses (yes vs. no)  
pregnant\_viable - had viable pregnancy over follow-up (yes vs. no)  
partnerage - Age of male partner (years)  
parity - number of births  
agefirstperiod - age at menarche (years)  
hight - height (m)  
weight -body weight (kg)  
regularcycles - self-reported cycle regularity (yes vs. no)  
IntercourseFrequency - frequency of intercourse (categorical variable)  
PhysicalActivityModerate - moderate physical activity (categorical variable)  
PhysicalActivityHard - vigorous physical activity (categorical variable)  
smoking\_group - smoking history (categorical variable)  
packyears - pack-years of ever smoking  
packyears\_partner - pack-years of ever smoking (partner)  
inttimedich - doing something to time intercourse (yes vs. no)  
ocpills - oral contraception as last method of birth control (yes vs. no)  
otherhormonalbc - hormonal contraception as last method of birth control (yes vs. no)  
barriermethods - barrier methods as last method of birth control (yes vs. no)  
withdrawalrhythm - withdrawal/natural FP as last method of birth control (yes vs. no)  
weightpartner - body weight of partner (kg)  
hightpartner - height of partner (m)  
coffeenumber - coffee (cups per week)  
cokelightnumber - cola light (bottles per week)  
redwinenumber - red wine (glasses per week)  
beernumber - beer (bottles per week)  
herbalteanumber - herbal tea (cups per week)  
otherteanumber - regular tea (cups per week)  
cokenumbe r - cola (bottles per week)  
otherfizzysftdrinksnumber - other softdrinks (bottles per week)

steady\_yrs - years with current partner  
otherfizzysoftdrinkslightnumber - other light softdrinks (bottles per week)  
VocationalTraining - education (categorical variable)  
decafcoffeenumber - decaffeinated coffee (cups per week)  
spiritsnumber - spirits (shots per week)  
whitewinenumber - white wine (glasses per week)  
DessertWineNumber - dessert wine (glasses per week)  
birthweight - participant birth weight (categorical variable)  
mothersmkgpregyes - participant's mother smoked during pregnancy (yes vs. no)  
term - participant born between 38-42 weeks gestation (yes vs. no)  
nottermlt38wks - participant born less than 38 weeks gestation (yes vs. no)  
nottermgt42wks - participant born more than 42 weeks gestation (yes vs. no)  
hbp - ever been diagnosed with high blood pressure (yes vs. no)  
thyroid - ever been diagnosed with thyroid condition (yes vs. no)  
pid - ever been diagnosed with pelvic inflammatory disease (yes vs. no)  
diab - ever been diagnosed with diabetes (yes vs. no)  
endometr - ever been diagnosed with endometriosis (yes vs. no)  
fibroids - ever been diagnosed with fibroids (yes vs. no)  
ovcyst - ever been diagnosed with ovarian cyst (yes vs. no)  
PeriodNextTime - Expected date of next menstrual period (categorical variable)  
AgeRegularPeriod - Age at which menstrual periods became regular (years)  
IrregPeriod - Irregular periods (yes vs. no)  
MenstruationDuration - Duration of menses (categorical variable)  
MenstruationHeavy - Intensity of menstrual flow (categorical variable)  
monthswait - months of waiting after discontinuation of hormonal contraception  
agefirstoc - age at first oral contraceptive use (years)  
durationoc - duration of oral contraceptive use (years)  
timesincelastoc - time since last oral contraceptive use (years)  
caesarean - ever had caesarean section (yes vs. no)  
gravidity - number of pregnancies  
contrpillsbrands - number of brands of oral contraceptives used  
SmearTestNeckUterus - recency of last pap smear (categorical variable)  
weightl17yold - weight at age 17 years (kg)  
hips - hip circumference (cm)  
waist - waist circumference (cm)
